# Supplementary material for: Divergent Protein Motifs Direct Elongation Factor P-Mediated Translational Regulation in Salmonella enterica and Escherichia coli
Source: PubMed Central journal article supplement — mBio. 2013 Apr 23;4(2):e00180-13. doi: 10.1128/mBio.00180-13 (PMC3638311; doi:10.1128/mbio.00180-13), 2013-04-23
Supplement: mbo002131497sf03.pdf [file mbo002131497sf03.pdf]

**A)**

|              |                                                                                                                                                          |
|--------------|----------------------------------------------------------------------------------------------------------------------------------------------------------|
| PoxB FL      | ... GAG CTG GCA GTG TGC GCC GGT TCA TGT GGA CCG GGC AAC CTG CAC CTG ATC AAT GGC CTG ...                                                                  |
|              | ... E L A V C A G S C G P G N L H L I N G L ...                                                                                                          |
| PoxB Shifted | ... GAG CTG GCA <u>AGT</u> GTG CGC CGG TTC ATG TGG ACC GGG CAA CCT GCA CCT GAT AAT GGC CTG ...                                                           |
|              | ... E L A S V R R F M W T G Q P A P D N G L ...                                                                                                          |
| Position     | <div style="display: flex; justify-content: space-between; width: 100%;"> <span>  70</span> <span>  75</span> <span>  80</span> <span>  85</span> </div> |

**B)**

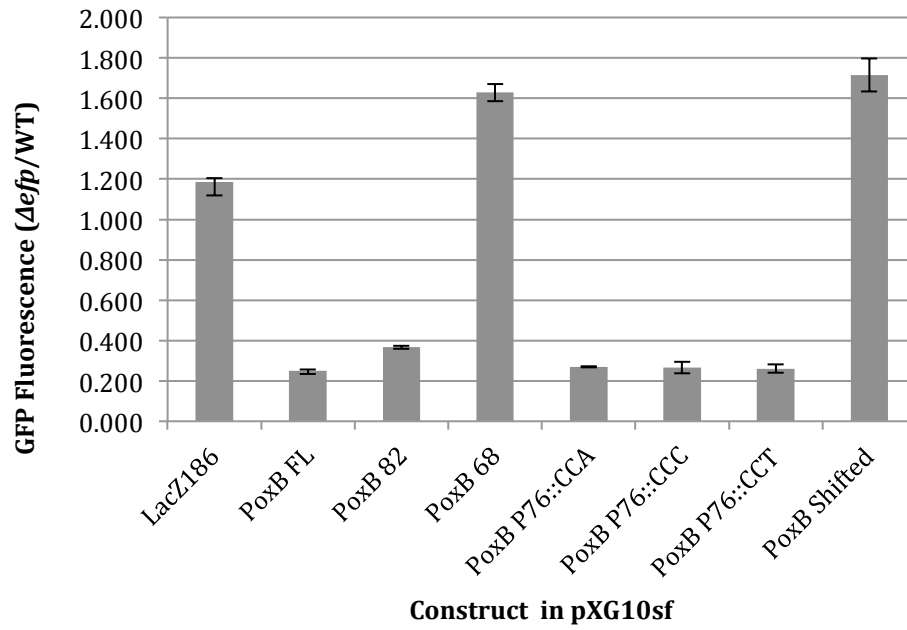

**Figure S3**
