# Supplementary figures and images for: Divergent Protein Motifs Direct Elongation Factor P-Mediated Translational Regulation in Salmonella enterica and Escherichia coli
Source: PubMed Central journal article supplement — mBio. 2013 Apr 23;4(2):e00180-13. doi: 10.1128/mBio.00180-13 (PMC3638311; doi:10.1128/mbio.00180-13), 2013-04-23

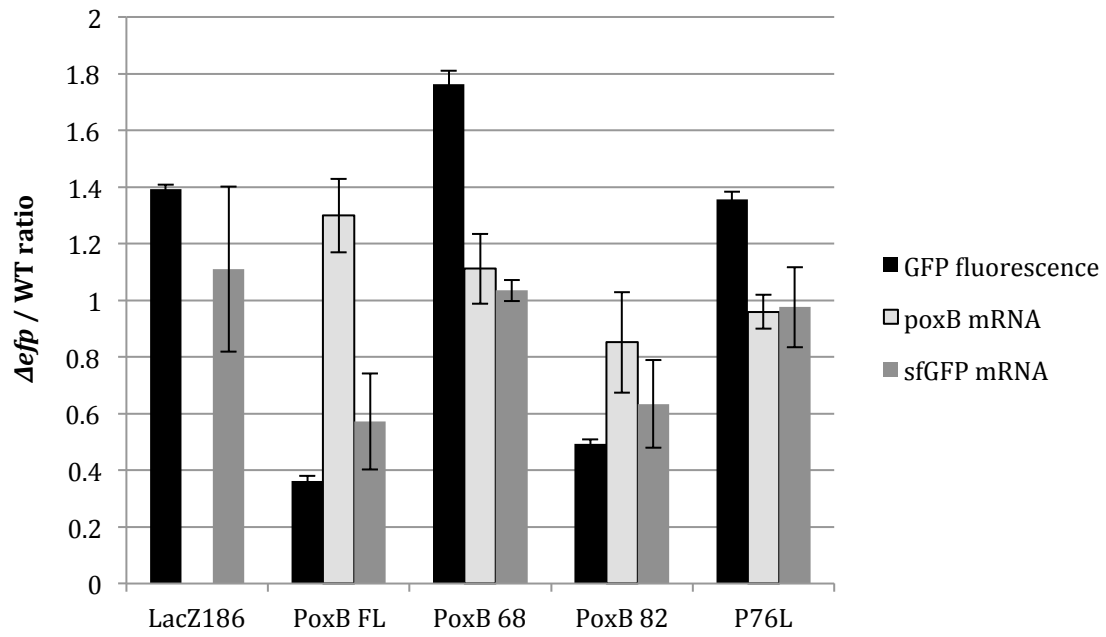

**Figure S1**

Supplement: mbo002131497sf01.pdf [file mbo002131497sf01.pdf]

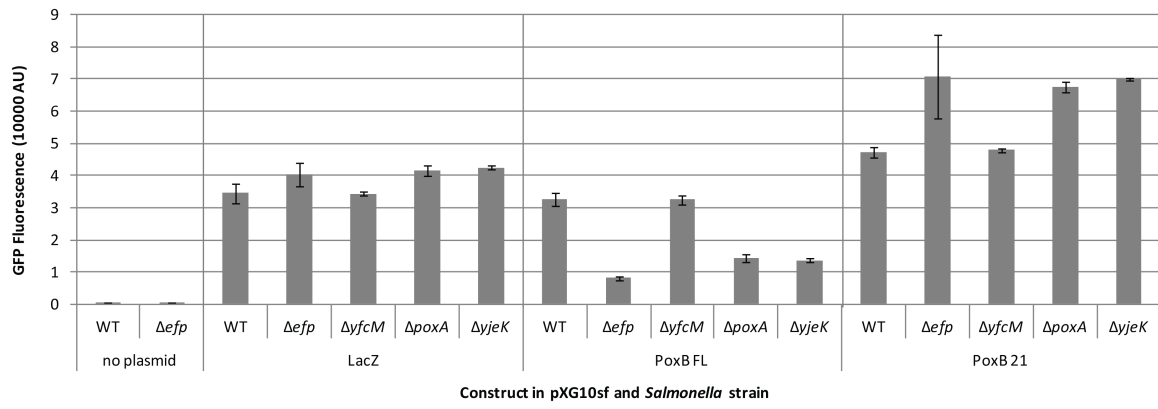

**Figure S2**

Supplement: mbo002131497sf02.pdf [file mbo002131497sf02.pdf]
